# Supplementary material for: Current infection control practices used in Australian and New Zealand cystic fibrosis centers
Source: Springer Nature journal article supplement (doi:10.1186/s12890-020-1052-y), 2020-01-17
Supplement: MOESM1 [file 23393318]

Demographics

1. What is your Australian CF data registry site number?

2. What CF service does your hospital provide?

- Adult
- Paediatric
- Combined adult and paediatric

3. How many people with CF attend your service?

- <50
- 50-100
- 100-200
- 200-300
- >300

4. On average, how many people with CF are admitted to your hospital on a weekday?

- <1
- 1-3
- 4-6
- 7-10
- 11-15
- 16-20
- >20

Infection control policy implementation

**Please answer the following questions about infection control policies that existed in your centre as at 31st July 2017.**

5. Has your centre changed infection control practices in the last 12 months?

Yes

No

If yes, what date did your centre implement the changes?

6. Have you changed infection control practices for outpatient care?

Yes

No

Not applicable

If yes, please specify the changes your centre has made

7. Do you plan to change your infection control practices in the next 12 months?

Yes

No

8. Have you changed infection control practices for inpatient care?

- Yes
- No
- Not applicable

If yes, please specify the changes your centre has made

9. Has there been a change to the cleaning procedures?

- Yes
- No
- Not applicable

If yes, please specify the changes your centre has made

10. Have you implemented a mask wear policy?

- Yes
- No
- Not applicable

If yes, please specify the changes your centre has made

General CF infection control guidelines

**Please answer the following questions about infection control policies that existed in your centre as at 31st July 2017.**

11. Are you currently following infection control guidelines for managing people with CF?

- Yes
- No

12. If yes, which guidelines do you follow (tick all that apply)?

- Australian CF Infection Control guidelines
- US CFF Infection Control guidelines
- Local hospital infection control guidelines
- Other, please state below

If other, please specify

13. Are there any specific infection control guidelines for managing people with CF infected with the following (please tick all that apply)?

- No Pseudomonas
- Pseudomonas aeruginosa*
- MRSA
- Burkholderia cepacia* complex
- Mycobacterium abscessus* complex
- NTM species other than *M. abscessus* complex
- Others, please state below
- If other, please specify

14. How often are people with CF screened for bacterial respiratory infections (please tick all that apply)?

- When sputum available
- Each clinic visit
- Each inpatient admission
- Every 3 months
- Every 6 months
- Every year
- Other, please state below
- If other, please specify

15. When is a person with CF no longer considered infected with specific organisms?

|                                                    | Never                 | Number of negative cultures | Time since last cultured |
|----------------------------------------------------|-----------------------|-----------------------------|--------------------------|
| <i>Pseudomonas aeruginosa</i>                      | <input type="radio"/> | <input type="radio"/>       | <input type="radio"/>    |
| MRSA                                               | <input type="radio"/> | <input type="radio"/>       | <input type="radio"/>    |
| <i>Burkholderia cepacia</i> complex                | <input type="radio"/> | <input type="radio"/>       | <input type="radio"/>    |
| <i>Mycobacterium abscessus</i> complex             | <input type="radio"/> | <input type="radio"/>       | <input type="radio"/>    |
| NTM species other than <i>M. abscessus</i> complex | <input type="radio"/> | <input type="radio"/>       | <input type="radio"/>    |

Please specify the number of negative cultures or the time since culture below:

16. If no longer considered infectious, can people with CF return to an outpatient clinic appropriate to the patients' current microbiology?

- Yes
- No

If yes, please specify how this occurs

Infection control in the communal areas of the hospital

17. Where is lung function testing performed for people with CF infected with:

|                                                    | Clinic rooms          | Communal room in respiratory laboratory | Separate room in respiratory laboratory | Other                 |
|----------------------------------------------------|-----------------------|-----------------------------------------|-----------------------------------------|-----------------------|
| No <i>Pseudomonas</i>                              | <input type="radio"/> | <input type="radio"/>                   | <input type="radio"/>                   | <input type="radio"/> |
| <i>Pseudomonas aeruginosa</i>                      | <input type="radio"/> | <input type="radio"/>                   | <input type="radio"/>                   | <input type="radio"/> |
| MRSA                                               | <input type="radio"/> | <input type="radio"/>                   | <input type="radio"/>                   | <input type="radio"/> |
| <i>Burkholderia cepacia</i> complex                | <input type="radio"/> | <input type="radio"/>                   | <input type="radio"/>                   | <input type="radio"/> |
| <i>Mycobacterium abscessus</i> complex             | <input type="radio"/> | <input type="radio"/>                   | <input type="radio"/>                   | <input type="radio"/> |
| NTM species other than <i>M. abscessus</i> complex | <input type="radio"/> | <input type="radio"/>                   | <input type="radio"/>                   | <input type="radio"/> |

If other, please specify location

18. If lung function is performed in the respiratory lab (lung function lab), where do people with CF sit while waiting?

- Communal respiratory lab waiting area
- Clinic room
- Other, please state below

If other, please specify

19. Is there advice given to people with CF (and their carers) about what to do in communal areas of the hospital during outpatient visits?

- Yes
- No

Comments

Infection control at CF outpatient clinics

20. Where do people with CF sit while waiting for outpatient consultation?

- Communal waiting area
- In designated consulting rooms on arrival
- Away from clinic with a call system (e.g. text message, page system)
- Other

If other, please specify

21. Are people with CF assigned a clinic room for all consultations to take place in during outpatient visit (i.e. medical, nursing and allied health go to patient room)?

- Yes
- No

22. Is there a cleaning procedure implemented for cleaning outpatient clinic rooms (please tick all that apply)?

|                                                    | Yes                   | No                    |
|----------------------------------------------------|-----------------------|-----------------------|
| All people with CF                                 | <input type="radio"/> | <input type="radio"/> |
| People with CF and specific respiratory infections | <input type="radio"/> | <input type="radio"/> |

If yes, what is the cleaning procedure?

23. Is there a dedicated infectious outpatient clinic for people with CF?

- One infection clinic with different infections (e.g. MRSA, *Mycobacterium abscessus* complex, *Burkholderia cepacia* complex, etc)
- Multiple 'sole' infection special clinics

24. What personal protective equipment do staff wear during infectious outpatient clinics (please tick all that apply)?

|                                                    | Gloves                   | Apron                    | Gown                     | Surgical mask            |                          | N95 respirator           | Other                    | None                     |
|----------------------------------------------------|--------------------------|--------------------------|--------------------------|--------------------------|--------------------------|--------------------------|--------------------------|--------------------------|
|                                                    |                          |                          |                          | with ties                | with elastic ear loops   |                          |                          |                          |
| No Pseudomonas                                     | <input type="checkbox"/> | <input type="checkbox"/> | <input type="checkbox"/> | <input type="checkbox"/> | <input type="checkbox"/> | <input type="checkbox"/> | <input type="checkbox"/> | <input type="checkbox"/> |
| <i>Pseudomonas aeruginosa</i>                      | <input type="checkbox"/> | <input type="checkbox"/> | <input type="checkbox"/> | <input type="checkbox"/> | <input type="checkbox"/> | <input type="checkbox"/> | <input type="checkbox"/> | <input type="checkbox"/> |
| MRSA                                               | <input type="checkbox"/> | <input type="checkbox"/> | <input type="checkbox"/> | <input type="checkbox"/> | <input type="checkbox"/> | <input type="checkbox"/> | <input type="checkbox"/> | <input type="checkbox"/> |
| <i>Burkholderia cepacia</i> complex                | <input type="checkbox"/> | <input type="checkbox"/> | <input type="checkbox"/> | <input type="checkbox"/> | <input type="checkbox"/> | <input type="checkbox"/> | <input type="checkbox"/> | <input type="checkbox"/> |
| <i>Mycobacterium abscessus</i> complex             | <input type="checkbox"/> | <input type="checkbox"/> | <input type="checkbox"/> | <input type="checkbox"/> | <input type="checkbox"/> | <input type="checkbox"/> | <input type="checkbox"/> | <input type="checkbox"/> |
| NTM species other than <i>M. abscessus</i> complex | <input type="checkbox"/> | <input type="checkbox"/> | <input type="checkbox"/> | <input type="checkbox"/> | <input type="checkbox"/> | <input type="checkbox"/> | <input type="checkbox"/> | <input type="checkbox"/> |

If other, please specify

25. Is there a washout period in specific rooms between patient consultations during outpatient clinics (please tick all that apply)?

|                                                    | No washout            | <30 minutes           | 30-60 minutes         | >60 minutes           |
|----------------------------------------------------|-----------------------|-----------------------|-----------------------|-----------------------|
| No Pseudomonas                                     | <input type="radio"/> | <input type="radio"/> | <input type="radio"/> | <input type="radio"/> |
| <i>Pseudomonas aeruginosa</i>                      | <input type="radio"/> | <input type="radio"/> | <input type="radio"/> | <input type="radio"/> |
| MRSA                                               | <input type="radio"/> | <input type="radio"/> | <input type="radio"/> | <input type="radio"/> |
| <i>Burkholderia cepacia</i> complex                | <input type="radio"/> | <input type="radio"/> | <input type="radio"/> | <input type="radio"/> |
| <i>Mycobacterium abscessus</i> complex             | <input type="radio"/> | <input type="radio"/> | <input type="radio"/> | <input type="radio"/> |
| NTM species other than <i>M. abscessus</i> complex | <input type="radio"/> | <input type="radio"/> | <input type="radio"/> | <input type="radio"/> |



26. Are extra cleaning procedures implemented after the infectious outpatient clinic is completed (please tick all that apply)?

- MRSA
- Burkholderia cepacia* complex
- Mycobacterium abscessus* complex
- NTM species other than *M. abscessus* complex
- Other

If other, please specify

27. Who cleans the outpatient rooms between patient consultations?

- CF team member
- Nursing staff
- Cleaning staff
- Not cleaned
- Other (please specify)

28. Do you change the bed linen in the outpatient rooms between patient consultations?

- Yes
- No
- Bed linen not used

29. What is cleaned in outpatient rooms between patient consultations (please tick all that apply)?

|                   | Alcohol-based<br>wipes   | Biocidal wipes           | Sporocidal wipes         | Other cleaning<br>product | Not cleaned              | Don't know               |
|-------------------|--------------------------|--------------------------|--------------------------|---------------------------|--------------------------|--------------------------|
| Desk              | <input type="checkbox"/> | <input type="checkbox"/> | <input type="checkbox"/> | <input type="checkbox"/>  | <input type="checkbox"/> | <input type="checkbox"/> |
| Chairs            | <input type="checkbox"/> | <input type="checkbox"/> | <input type="checkbox"/> | <input type="checkbox"/>  | <input type="checkbox"/> | <input type="checkbox"/> |
| Bed               | <input type="checkbox"/> | <input type="checkbox"/> | <input type="checkbox"/> | <input type="checkbox"/>  | <input type="checkbox"/> | <input type="checkbox"/> |
| Door handle       | <input type="checkbox"/> | <input type="checkbox"/> | <input type="checkbox"/> | <input type="checkbox"/>  | <input type="checkbox"/> | <input type="checkbox"/> |
| Medical equipment | <input type="checkbox"/> | <input type="checkbox"/> | <input type="checkbox"/> | <input type="checkbox"/>  | <input type="checkbox"/> | <input type="checkbox"/> |
| Computer keyboard | <input type="checkbox"/> | <input type="checkbox"/> | <input type="checkbox"/> | <input type="checkbox"/>  | <input type="checkbox"/> | <input type="checkbox"/> |
| Other             | <input type="checkbox"/> | <input type="checkbox"/> | <input type="checkbox"/> | <input type="checkbox"/>  | <input type="checkbox"/> | <input type="checkbox"/> |

For other cleaning product or other in room item, please specify

30. Who cleans the outpatient rooms at the end of the clinic session?

- CF team member
- Nursing staff
- Cleaning staff
- Not cleaned
- Other (please specify)

31. Do you change the bed linen in the outpatient rooms at the end of the clinic session?

- Yes
- No
- Bed linen not used

32. What is cleaned in outpatient rooms at the end of the clinic session (please tick all that apply)?

|                   | Alcohol-based<br>wipes   | Biocidal wipes           | Sporocidal wipes         | Other cleaning<br>product | Not cleaned              | Don't know               |
|-------------------|--------------------------|--------------------------|--------------------------|---------------------------|--------------------------|--------------------------|
| Desk              | <input type="checkbox"/> | <input type="checkbox"/> | <input type="checkbox"/> | <input type="checkbox"/>  | <input type="checkbox"/> | <input type="checkbox"/> |
| Chairs            | <input type="checkbox"/> | <input type="checkbox"/> | <input type="checkbox"/> | <input type="checkbox"/>  | <input type="checkbox"/> | <input type="checkbox"/> |
| Bed               | <input type="checkbox"/> | <input type="checkbox"/> | <input type="checkbox"/> | <input type="checkbox"/>  | <input type="checkbox"/> | <input type="checkbox"/> |
| Door handle       | <input type="checkbox"/> | <input type="checkbox"/> | <input type="checkbox"/> | <input type="checkbox"/>  | <input type="checkbox"/> | <input type="checkbox"/> |
| Medical equipment | <input type="checkbox"/> | <input type="checkbox"/> | <input type="checkbox"/> | <input type="checkbox"/>  | <input type="checkbox"/> | <input type="checkbox"/> |
| Computer keyboard | <input type="checkbox"/> | <input type="checkbox"/> | <input type="checkbox"/> | <input type="checkbox"/>  | <input type="checkbox"/> | <input type="checkbox"/> |
| Other             | <input type="checkbox"/> | <input type="checkbox"/> | <input type="checkbox"/> | <input type="checkbox"/>  | <input type="checkbox"/> | <input type="checkbox"/> |

For other cleaning product or other in room item, please specify

Infection control during hospital admissions

33. How are people with CF managed during a hospital admission?

- Dedicated CF ward
- General respiratory ward(s)
- Infectious ward(s)
- General medical ward(s)
- Other

If other, please specify

34. What accommodation is available for people with CF during hospitalisation (please tick all that apply)?

- Single room with ensuite
- Single room with shared bathroom
- Multi-bed room with other people with CF
- Multi-bed room without other people with CF
- Isolation room (e.g. negative pressure room)
- Other

If other, please specify

35. Do you have a washout period in the patient rooms between patient stays (please tick all that apply)?

- No washout
- <30 minutes
- 30-60 minutes
- >60 minutes

36. Where is physiotherapy (excluding exercise) performed on people with CF during hospital admission (please tick all that apply)?

- Inpatient room
- CF gym
- General gym
- Other

If other, please specify

37. Where is exercise performed during hospital admission (please tick all that apply)?

- Inpatient room
- CF gym
- General gym
- Outdoors/open areas
- Other

If other, please specify

38. Are patients scheduled for gym attendance?

- Yes
- No

If yes, please specify

39. Is there a separate gym for infectious patients?

- Yes
- No

40. Is individual observation equipment available for each inpatient?

|                        | Yes                   | No                    |
|------------------------|-----------------------|-----------------------|
| Blood pressure monitor | <input type="radio"/> | <input type="radio"/> |
| Spirometer             | <input type="radio"/> | <input type="radio"/> |
| Thermometer            | <input type="radio"/> | <input type="radio"/> |
| Oximeter               | <input type="radio"/> | <input type="radio"/> |
| Other                  | <input type="radio"/> | <input type="radio"/> |

If other, please specify

41. Where is spirometry performed during hospital admission (please tick all that apply)?

|                                                    | Patient's own hospital room | Communal room in respiratory lab | Separate room in respiratory lab | Other (e.g. uses personal spirometer) |
|----------------------------------------------------|-----------------------------|----------------------------------|----------------------------------|---------------------------------------|
| No Pseudomonas                                     | <input type="radio"/>       | <input type="radio"/>            | <input type="radio"/>            | <input type="radio"/>                 |
| <i>Pseudomonas aeruginosa</i>                      | <input type="radio"/>       | <input type="radio"/>            | <input type="radio"/>            | <input type="radio"/>                 |
| MRSA                                               | <input type="radio"/>       | <input type="radio"/>            | <input type="radio"/>            | <input type="radio"/>                 |
| <i>Burkholderia cepacia</i> complex                | <input type="radio"/>       | <input type="radio"/>            | <input type="radio"/>            | <input type="radio"/>                 |
| <i>Mycobacterium abscessus</i> complex             | <input type="radio"/>       | <input type="radio"/>            | <input type="radio"/>            | <input type="radio"/>                 |
| NTM species other than <i>M. abscessus</i> complex | <input type="radio"/>       | <input type="radio"/>            | <input type="radio"/>            | <input type="radio"/>                 |

Comments

42. Are staff provided any personal protective equipment when entering patient rooms (please tick all that apply)?

|                                                    | Gloves                   | Apron                    | Gown                     | Surgical mask with ties  | Surgical mask with elastic ear loops | N95 respirator           | Other                    |
|----------------------------------------------------|--------------------------|--------------------------|--------------------------|--------------------------|--------------------------------------|--------------------------|--------------------------|
| No Pseudomonas                                     | <input type="checkbox"/> | <input type="checkbox"/> | <input type="checkbox"/> | <input type="checkbox"/> | <input type="checkbox"/>             | <input type="checkbox"/> | <input type="checkbox"/> |
| <i>Pseudomonas aeruginosa</i>                      | <input type="checkbox"/> | <input type="checkbox"/> | <input type="checkbox"/> | <input type="checkbox"/> | <input type="checkbox"/>             | <input type="checkbox"/> | <input type="checkbox"/> |
| MRSA                                               | <input type="checkbox"/> | <input type="checkbox"/> | <input type="checkbox"/> | <input type="checkbox"/> | <input type="checkbox"/>             | <input type="checkbox"/> | <input type="checkbox"/> |
| <i>Burkholderia cepacia</i> complex                | <input type="checkbox"/> | <input type="checkbox"/> | <input type="checkbox"/> | <input type="checkbox"/> | <input type="checkbox"/>             | <input type="checkbox"/> | <input type="checkbox"/> |
| <i>Mycobacterium abscessus</i> complex             | <input type="checkbox"/> | <input type="checkbox"/> | <input type="checkbox"/> | <input type="checkbox"/> | <input type="checkbox"/>             | <input type="checkbox"/> | <input type="checkbox"/> |
| NTM species other than <i>M. abscessus</i> complex | <input type="checkbox"/> | <input type="checkbox"/> | <input type="checkbox"/> | <input type="checkbox"/> | <input type="checkbox"/>             | <input type="checkbox"/> | <input type="checkbox"/> |

If other, please specify

43. Do other members of the multidisciplinary team (e.g. social worker, dietician, etc) follow the same infection control procedures when reviewing inpatients?

- Yes
- No
- Don't know
- If no, what is different?

44. How frequently are patient rooms cleaned during admission?

- Daily
- Every second day
- Weekly
- At end of admission
- Other (please specify)

45. Who cleans the areas in the patient rooms (please tick all that apply)?

|                   | Cleaning staff           | Nursing staff            | Other                    | Not cleaned              |
|-------------------|--------------------------|--------------------------|--------------------------|--------------------------|
| Bed               | <input type="checkbox"/> | <input type="checkbox"/> | <input type="checkbox"/> | <input type="checkbox"/> |
| Handrails         | <input type="checkbox"/> | <input type="checkbox"/> | <input type="checkbox"/> | <input type="checkbox"/> |
| Cupboards/benches | <input type="checkbox"/> | <input type="checkbox"/> | <input type="checkbox"/> | <input type="checkbox"/> |
| Door handles      | <input type="checkbox"/> | <input type="checkbox"/> | <input type="checkbox"/> | <input type="checkbox"/> |
| Medical equipment | <input type="checkbox"/> | <input type="checkbox"/> | <input type="checkbox"/> | <input type="checkbox"/> |
| Patient bathroom  | <input type="checkbox"/> | <input type="checkbox"/> | <input type="checkbox"/> | <input type="checkbox"/> |
| Other             | <input type="checkbox"/> | <input type="checkbox"/> | <input type="checkbox"/> | <input type="checkbox"/> |

For other in room item or other personnel, please specify

46. How is the patient room cleaned (please tick all that apply)?

|                   | Alcohol based wipes      | Biocidal wipes           | Sporocidal wipes         | Other cleaning product   | Not cleaned              |
|-------------------|--------------------------|--------------------------|--------------------------|--------------------------|--------------------------|
| Bed               | <input type="checkbox"/> | <input type="checkbox"/> | <input type="checkbox"/> | <input type="checkbox"/> | <input type="checkbox"/> |
| Handrails         | <input type="checkbox"/> | <input type="checkbox"/> | <input type="checkbox"/> | <input type="checkbox"/> | <input type="checkbox"/> |
| Cupboards/benches | <input type="checkbox"/> | <input type="checkbox"/> | <input type="checkbox"/> | <input type="checkbox"/> | <input type="checkbox"/> |
| Door handles      | <input type="checkbox"/> | <input type="checkbox"/> | <input type="checkbox"/> | <input type="checkbox"/> | <input type="checkbox"/> |
| Medical equipment | <input type="checkbox"/> | <input type="checkbox"/> | <input type="checkbox"/> | <input type="checkbox"/> | <input type="checkbox"/> |
| Bathrooms         | <input type="checkbox"/> | <input type="checkbox"/> | <input type="checkbox"/> | <input type="checkbox"/> | <input type="checkbox"/> |
| Other             | <input type="checkbox"/> | <input type="checkbox"/> | <input type="checkbox"/> | <input type="checkbox"/> | <input type="checkbox"/> |

For other cleaning product or other in room item, please specify

47. Do you change the curtains between patient admissions?

- Yes
- No
- We don't use curtains



Mask wearing for source control

48. Are face masks advised for people with CF?

- Yes
- No

49. What type of face masks are people with CF required to wear (tick all that apply)?

- Surgical mask with ties
- Surgical mask with elastic ear loops
- N95 respirator
- Other

If other, please specify

50. Do you give instructions on how to wear the mask?

|                                       | Yes                   | No                    |
|---------------------------------------|-----------------------|-----------------------|
| Where masks are located?              | <input type="radio"/> | <input type="radio"/> |
| How to apply a mask?                  | <input type="radio"/> | <input type="radio"/> |
| How long to wear a mask?              | <input type="radio"/> | <input type="radio"/> |
| When to change a mask?                | <input type="radio"/> | <input type="radio"/> |
| How to dispose of masks?              | <input type="radio"/> | <input type="radio"/> |
| Hand hygiene after touching the mask? | <input type="radio"/> | <input type="radio"/> |
| Hand hygiene after removing the mask? | <input type="radio"/> | <input type="radio"/> |

51. Who applies the mask?

- Self
- Carer
- Healthcare worker

52. Are people with CF and/or carers trained in applying a mask?

|                     | Yes                   | No                    |
|---------------------|-----------------------|-----------------------|
| Signage             | <input type="radio"/> | <input type="radio"/> |
| One-on-one training | <input type="radio"/> | <input type="radio"/> |
| Video               | <input type="radio"/> | <input type="radio"/> |

Comments

53. During outpatient visits, where must the mask be worn (please tick all that apply)?

- All parts of the hospital
- All parts of the hospital excluding the clinic room allocated
- Visiting lung function
- Visiting pharmacy
- Walking in corridors
- Other
- If other, please specify

54. Are people with CF requested to wear a mask during the following procedures?

|                     | Optional              | Required              |
|---------------------|-----------------------|-----------------------|
| Exercise in the gym | <input type="radio"/> | <input type="radio"/> |
| Physiotherapy       | <input type="radio"/> | <input type="radio"/> |
| Other               | <input type="radio"/> | <input type="radio"/> |

If other, please specify

55. During hospital admission, are people with CF required to wear masks outside their hospital room?

- Yes
- No

If yes, please specify

56. Are there any other infection control procedures not highlighted in the above questions, that you are required to undertake when treating people with certain infections?
